# Supplementary material for: Impact of Bi doping on nonradiative carrier recombination in CsPbI3
Source: Royal Society of Chemistry journal article supplement (doi:10.1039/d1cp05552f), 2022-01-01
Supplement: d1cp05552f1.pdf [file d1cp05552f1.pdf]

## Supporting Information

### Impact of Bi doping on nonradiative carrier recombination in CsPbI<sub>3</sub>

Jiajia Zhang<sup>a,\*</sup>, Chenggen Xie<sup>a</sup>, and Lijuan Chen<sup>a,\*</sup>

<sup>a</sup>Anhui Provincial Laboratory of Biomimetic Sensor and Detecting Technology, College of Materials and Chemical Engineering, West Anhui University, Lu'an 237012, China

\*Email: [jjzh@wxc.edu.cn](mailto:jjzh@wxc.edu.cn); [lijuanch@mail.ustc.edu.cn](mailto:lijuanch@mail.ustc.edu.cn)

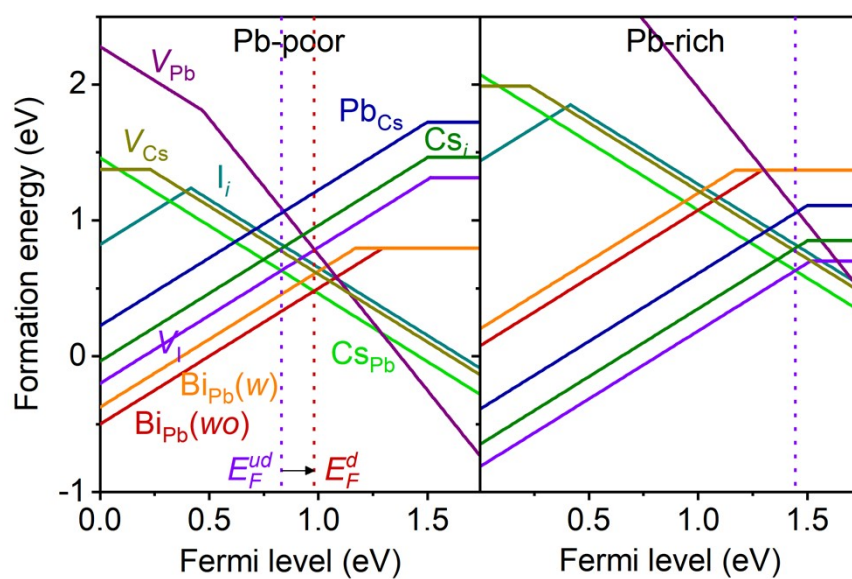

**Figure S1.** Formation energies of  $\text{Bi}_{\text{Pb}}$ ,  $\text{I}_i$ ,  $\text{V}_\text{I}$ ,  $\text{CS}_{\text{Pb}}$ ,  $\text{V}_{\text{Pb}}$ ,  $\text{CS}_i$ ,  $\text{V}_{\text{Cs}}$ , and  $\text{Pb}_{\text{Cs}}$  in  $\text{CsPbI}_3$  under Pb-poor and -rich conditions.  $E_F^{ud}$  (violet dashed line) and  $E_F^d$  (red dashed line) mark the equilibrium Fermi levels in undoped and Bi-doped  $\text{CsPbI}_3$ , respectively.

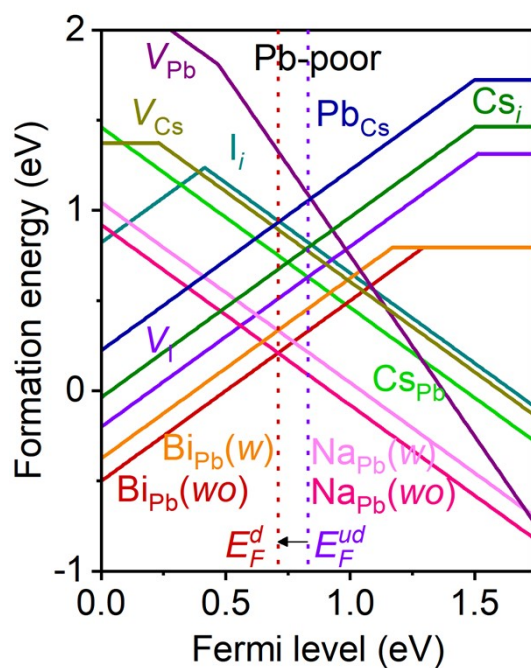

**Figure S2.** Formation energies of  $\text{Na}_{\text{Pb}}$ ,  $\text{Bi}_{\text{Pb}}$ ,  $\text{I}_i$ ,  $\text{V}_\text{I}$ ,  $\text{CS}_{\text{Pb}}$ ,  $\text{V}_{\text{Pb}}$ ,  $\text{CS}_i$ ,  $\text{V}_{\text{Cs}}$ , and  $\text{Pb}_{\text{Cs}}$  in  $\text{CsPbI}_3$  under Pb-poor conditions.
